# Supplementary material for: A monolithic air cathode derived from bamboo for microbial fuel cells
Source: Royal Society of Chemistry journal article supplement (doi:10.1039/c7ra04571a), 2017-01-01
Supplement: c7ra04571a1.pdf [file c7ra04571a1.pdf]

1 **Supplementary Information:**

2

3 **A monolithic air cathode derived from bamboo for microbial fuel cells**

4

5 *Wei Yang<sup>a,b</sup>, Jun Li<sup>a,b\*</sup>, Liang Zhang<sup>a,b</sup>, Xun Zhu<sup>a,b</sup>, Qiang Liao<sup>a,b</sup>*

6

7 *a Key Laboratory of Low-grade Energy Utilization Technologies and Systems,*  
8 *Chongqing University, Chongqing 400030, China*

9 *b Institute of Engineering Thermophysics, Chongqing University, Chongqing*  
10 *400030, China*

11

12

13

14

15

16

17

18

19

20

21

22

23

24 \*Corresponding author. Tel.: +86-23-6510-2474; fax: +86-23-6510-2474; E-mail

25 address: [lijun@cqu.edu.cn](mailto:lijun@cqu.edu.cn) (J. Li).

26 **Calculation of removal efficiency and coulombic efficiency**

27 Chemical oxygen demand (COD) removal efficiency (RE) of the system was  
28 calculated as

29 
$$RE = (C_{in} - C_{end}) / C_{in} \times 100 \% \quad (S1)$$

30 where  $C_{in}$  is the initial COD concentration in each fed-batch cycle and  $C_{end}$  is the  
31 COD concentration at the end of each fed-batch cycle.

32 The coulombic efficiency (CE) was defined as the ratio of total recovered  
33 coulombs by integrating the current over time to the theoretical charge generated if  
34 the substrate was completely converted to electricity. It was calculated as

35 
$$CE = C_p / C_T \times 100 \% \quad (S2)$$

36 where  $C_p$  is the total Coulombs obtained by integrating the current over time,  
37 calculated as  $C_p = \int I dt$ , and  $C_T$  is the theoretical amount of Coulombs that can be  
38 produced from acetate, calculated as

39 
$$C_T = nF(C_{in} - C_{end})V/M \quad (S3)$$

40 where  $F$  is Faraday's constant ( $96485 \text{ C mol}^{-1}$  electrons),  $n$  the number of moles of  
41 electrons produced per mole of substrate ( $n=8$ ),  $V$  the liquid volume of the MFCs, and  
42  $M=82$  the molecular weight of sodium acetate. The COD concentration of the analyte  
43 was measured using fast digestion spectrophotometric with a COD digester and  
44 photometer (Lianhua 5B-3C, China).

45

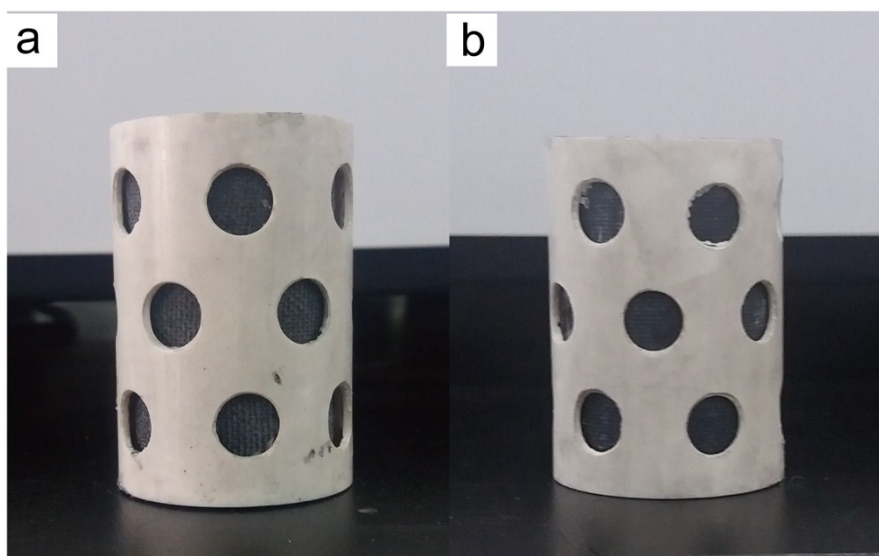

46

47 Fig. S1 Picture of the BC (a) and Pt/C (b) cathode supported by the perforated PVC tube.

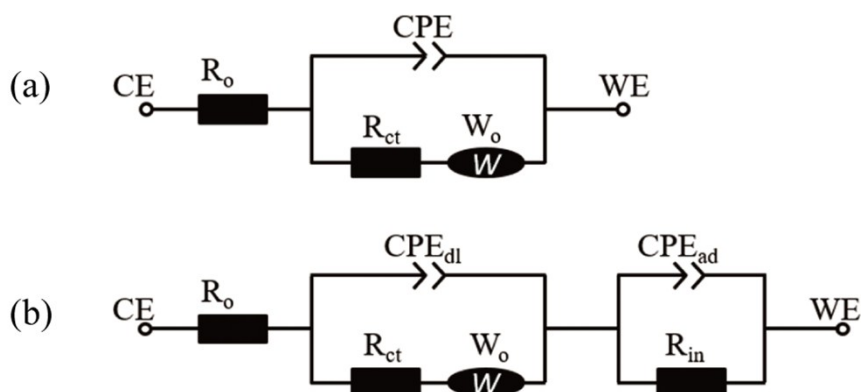

48

49 Fig. S2. Equivalent circuits for the Pt/C cathode (a) and the BC and BCT cathode (b).

50 The components of  $R_o$ ,  $R_{in}$ ,  $R_{ct}$ ,  $C_{dl}$ ,  $C_{ad}$  and  $W$  in equivalent circuits representing the ohmic res  
 51 istance, the interface ohmic resistance, the charge transfer resistance, the double layer capacitance,  
 52 the pore adsorption capacitance, and the Warburg impedance, respectively.

53

54 **Physical characterization of the catalysts**

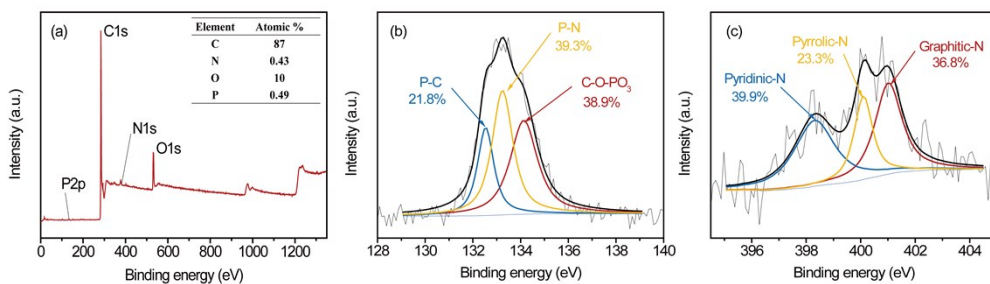

55

56 Fig. S3 XPS spectra (a) and deconvolution of the N1s (b) and P2p (c) spectra of BC.

57 XPS measurements (Fig. S3) are conducted to characterize the chemical  
 58 composition of the BCT. The full XPS scan of the sample is shown in Fig. S3a. The  
 59 signals of C1s, O1s, N1s and P2p were detected to confirm the existence of N and P in  
 60 the sample. To elucidate the property of N and P bonding to the carbon atoms, the  
 61 high resolution XPS spectrum of N1s and P2p was recorded (Fig. S 3b-c). As shown  
 62 in Fig. S 3b, the deconvolution of the N1s spectrum revealed that the N-containing  
 63 species, including graphitic-N (~401.0 eV), pyrrolic-N (~ 400.1 eV) and pyridinic-N  
 64 (~ 398.3 eV), were found for the cathode (Pels et al., 1995). According to the results,  
 65 the relative ratio of graphitic-N and pyridinic-N in BC was 36.8 % and 39.9 %,  
 66 respectively. Previous studies have indicated that the graphitic-N and pyridinic-N play  
 67 a crucial role in enhancing the ORR activity of carbon-based materials. Lai et al. has  
 68 demonstrated that graphitic-N and pyridinic-N can greatly increase the limiting  
 69 current density and the onset potentials respectively (Lai et al., 2012). Similarly, the  
 70 deconvolution of P2p for BC demonstrated three prominent peaks assigned as P-C  
 71 (~132.5 eV), P-N (~133.2 eV) and C-O-PO<sub>3</sub> (~134.1 eV), as shown in Fig. S 3c. The  
 72 element P had similar non-metallic characteristics as element N, and the catalytic  
 73 mechanism of P-doped carbon catalyst in MFCs could be explained using the research  
 74 of N-doped carbon catalysts (Chen et al., 2014). Razmjooei et al. suggested that P-N  
 75 and C-O-PO<sub>3</sub> were highly reactive and stable active centers for ORR (Razmjooei et al.,

76 2015). Chen et al. also reported an excellent ORR characteristic of N and P dual-  
 77 doped carbon catalyst in MFCs with an average electron transfer number of  $\sim 3.5$   
 78 (Chen et al., 2014). With the abundant N and P self-doping in BCT, a good ORR  
 79 property can be expected.

80

81 **Table S1 Component analysis of the internal resistance of the different air**  
 82 **cathodes.**

|                                    | Pt/C                  | BC                    | BCT                    |
|------------------------------------|-----------------------|-----------------------|------------------------|
| $R_0$ ( $\Omega$ )                 | 1.52                  | 1.71                  | 1.46                   |
| $CPE_{dl}$ ( $F \cdot s^{(n-1)}$ ) | $1.04 \times 10^{-4}$ | $1.30 \times 10^{-4}$ | $4.03 \times 10^{-5}$  |
| $N_1$                              | 0.74                  | 0.96                  | 0.90                   |
| $R_{in}$ ( $\Omega$ )              | —                     | 0.31                  | 2.15                   |
| $CPE_{ad}$                         | —                     | $2.16 \times 10^{-4}$ | $1.02 \times 10^{-2}$  |
| $N_2$                              | —                     | 0.89                  | 0.58                   |
| $R_{ct}$                           | 2.69                  | 4.02                  | 1.74                   |
| $W$ ( $\Omega \cdot s^{-1/2}$ )    | 1.64                  | $3.19 \times 10^{-3}$ | $1.46 \times 10^{-14}$ |
| $R_t$ ( $\Omega$ )                 | 5.85                  | 6.04                  | 5.35                   |

83

84 **References:**

85 Pels, J. R., Kapteijn, F., Moulijn, J. A., Zhu, Q., Thomas, K. M., Carbon, 1995,  
 86 33, 1641–1653.

87 Lai, L., Potts, J. R., Zhan, D., Wang, L., Poh, C. K., Tang, C.H., Gong, H., Shen,  
 88 Z.X., Lin, J.Y., Ruoff, R.S., Energy Environ. Sci., 2012, 5, 7936–7942.

89 Razmjooei, F., Singh, K. P., Yu, J. S., Catal. Today, 2016, 260, 148–157.

90 Chen, Z. H., Li, K. X., Pu, L. T., Bioresour. Technol., 2014, 170, 379–384.
